# Supplementary material for: Biological Properties of Extracts Obtained from In Vitro Culture of Plectranthus scutellarioides in a Cell Model
Source: MDPI journal article supplement (doi:10.3390/ijms25021043), 2024-01-15
Supplement: s1 [file s1]

# SUPPLEMENTARY FILE

Table S1. Mass chromatograms of the tested samples recorded in negative and positive ionization modes

|                                                                         |              |
|-------------------------------------------------------------------------|--------------|
| Type of mass chromatogram                                               | Chromatogram |
| Mass chromatogram from the aerial parts in the negative ionization mode |              |
| Mass chromatogram from the aerial parts in the positive ionization mode |              |
| Mass chromatogram from the roots in the negative ionization mode        |              |
| Mass chromatogram from the root in the positive ionization mode         |              |

Table S2. The list of MS/MS spectra of the tentatively identified compounds

|    |                |                     |
|----|----------------|---------------------|
| No | MS/MS spectrum | Proposed compound   |
| 1  |                | Propylglutaric acid |

|   |                                                                                                               |                        |
|---|---------------------------------------------------------------------------------------------------------------|------------------------|
| 2 | <p>ESI Product Ion (rt: 12.167 min) Frag=110.0V CID@20.0 (167.0356)*[<math>^{-}</math>]* vPSL_1_neg10uL.d</p> | Vanillic acid          |
| 3 | <p>ESI Product Ion (rt: 12.167 min) Frag=110.0V CID@20.0 (167.0356)*[<math>^{-}</math>]* vPSL_1_neg10uL.d</p> | Syringic acid          |
| 4 | <p>ESI Product Ion (rt: 12.167 min) Frag=110.0V CID@20.0 (167.0356)*[<math>^{-}</math>]* vPSL_1_neg10uL.d</p> | Dihydroxybenzoic acid  |
| 5 | <p>ESI Product Ion (rt: 15.219 min) Frag=110.0V CID@20.0 (137.0227)*[<math>^{-}</math>]* vPSL_1_neg10uL.d</p> | Hydroxybenzoic acid    |
| 6 | <p>ESI Scan (rt: 17.183 min) Frag=110.0V vPSL_2_neg10uL.d</p>                                                 | Rosmarinic acid isomer |
| 7 | <p>ESI Product Ion (rt: 17.154 min) Frag=110.0V CID@10.0 (176.0341)*[<math>^{-}</math>]* vPSL_1_neg10uL.d</p> | Caffeic acid           |
| 8 | <p>ESI Product Ion (rt: 19.401 min) Frag=110.0V CID@10.0 (193.0381)*[<math>^{-}</math>]* vPSL_2_neg10uL.d</p> | Coumaric acid          |
| 9 |                                                                                                               | Ferulic acid           |

|    |                                                                                                                                                                                                                              |                 |
|----|------------------------------------------------------------------------------------------------------------------------------------------------------------------------------------------------------------------------------|-----------------|
|    | 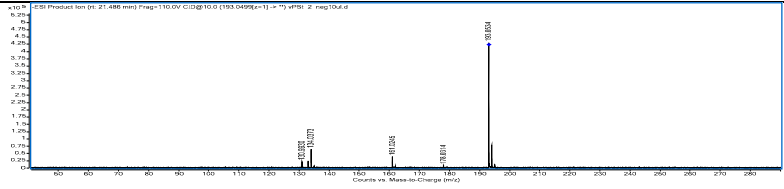 <p>ESI Product Ion (t: 21.486 min) Frag=110.0V CID@10.0 (193.0496&lt;+1&gt;-*) vPSt_2_neg10u.d</p>                                        |                 |
| 10 |  <p>ESI Product Ion (t: 22.375 min) Frag=110.0V CID@10.0 (313.0688&lt;+1&gt;-*) vPSt_1_neg10u.d</p> <p>Counts vs. Mass-to-Charge (m/z)</p> | Crisimaritin    |
| 11 |  <p>ESI Product Ion (t: 20.902 min) Frag=110.0V CID@10.0 (359.0716&lt;+1&gt;-*) vPSt_2_neg10u.d</p> <p>Counts vs. Mass-to-Charge (m/z)</p> | Rosmarinic acid |
